# Supplementary material for: Phosphorylation of the neurogenic transcription factor SOX11 on serine 133 modulates neuronal morphogenesis
Source: PubMed Central journal article supplement (PMC6212486; doi:10.1038/s41598-018-34480-x), 2018-11-01
Supplement: 41598_2018_34480_MOESM1_ESM.pdf [file 41598_2018_34480_MOESM1_ESM.pdf]

# Supplemental Figure 1

## **Phosphorylation of the neurogenic transcription factor SOX11 on serine 133 modulates neuronal morphogenesis**

Elli-Anna Balta<sup>1</sup>, Iris Schöffner<sup>1</sup>, Marie-Theres Wittmann<sup>1</sup>, Elisabeth Sock<sup>1</sup>, Felix von Zweydford<sup>2</sup>, Julia von Wittgenstein<sup>1</sup>, Kathrin Steib<sup>3</sup>, Birgit Heim<sup>4</sup>, Elisabeth Kremmer<sup>5</sup>, Benjamin Martin Häberle<sup>1</sup>, Marius Ueffing<sup>4</sup>, Dieter Chichung Lie<sup>1,6\*</sup>, Christian Johannes Gloeckner<sup>2,4,6\*</sup>

<sup>1</sup> Institute of Biochemistry, Friedrich-Alexander Universität Erlangen-Nürnberg, 91054 Erlangen, Germany

<sup>2</sup> DZNE-German Center for Neurodegenerative Diseases, 72076 Tübingen, Germany

<sup>3</sup> Institute of Developmental Genetics, Helmholtz Zentrum München, German Research Center for Environmental Health, 85764 Neuherberg, Germany

<sup>4</sup> University of Tübingen, Institute for Ophthalmic Research, Center for Ophthalmology, 72076 Tübingen, Germany

<sup>5</sup> Monoclonal Antibody Core Facility, Helmholtz Zentrum München, German Research Center for Environmental Health, 85764 Neuherberg, Germany

<sup>6</sup> equal contribution

## Supplemental Figure 1

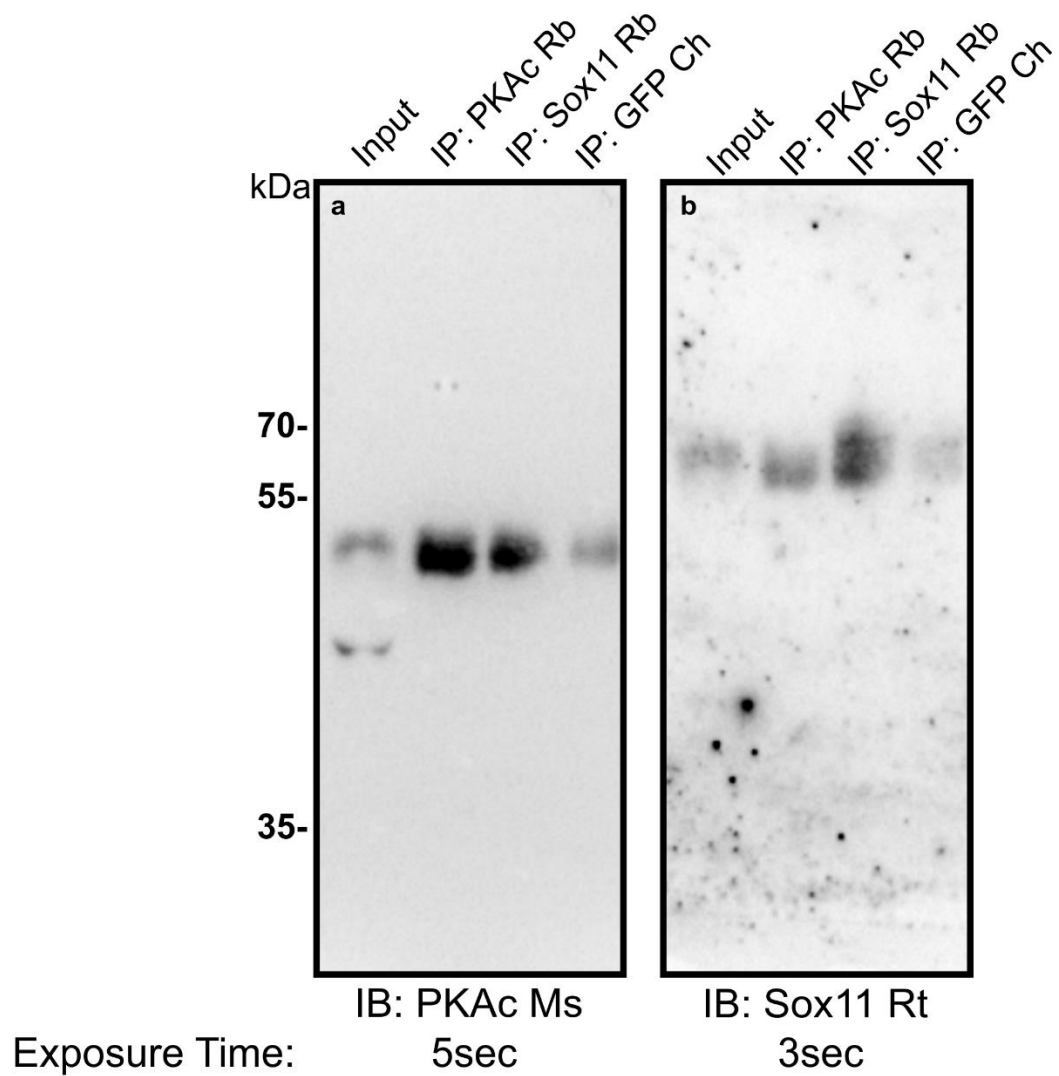

### Supplemental Figure 1: Full blots from Figure 2d.

The membrane was blotted with an anti-PKA mouse (Ms) antibody. The picture was taken 5 seconds after exposure (a). The same membrane was sequentially blotted with an anti-SOX11 rat (Rt) antibody. The picture was taken 3 seconds after exposure (b).
